# Supplementary material for: Advancing the Rose Rosette Virus Minireplicon and Encapsidation System by Incorporating GFP, Mutations, and the CMV 2b Silencing Suppressor
Source: MDPI journal article supplement (doi:10.3390/v14040836), 2022-04-17
Supplement: s1 [file s1]

**Table S1. Primers used for cloning, RT-PCR and RT-qPCR**

| <b><u>Name</u></b> | <b><u>Sequence</u></b>                       | <b><u>Nt Position</u></b> | <b><u>Function(s)</u></b> |
|--------------------|----------------------------------------------|---------------------------|---------------------------|
| TAG                | GGCCGTCATGGTGGCGAATA                         | N/A                       | PCR and qPCR              |
| GFP209FT           | GGCCGTCATGGTGGCGAATAAGTGCTTCAGCCGCTACCCC     | 209 - 228                 | Tagged-RT primer          |
| GFP414RT           | GGCCGTCATGGTGGCGAATATGTACTCCAGCTTGTGCCCC     | 414 - 433                 | Tagged-RT primer          |
| GFP209F            | AGTGCTTCAGCCGCTACCCC                         | 209 - 228                 | PCR and qPCR              |
| GFP414R            | TGTACTCCAGCTTGTGCCCC                         | 414 - 433                 | PCR and qPCR              |
| R5GFPPF-IF         | AAGCTTGCACCAAGTGATGGTGAGCAAGGGCGAGGA         | Overlaps RNA5 and eGFP    | Amplify eGFP, Cloning     |
| R5GFPR-IF          | AAATATATTGTAACCTTTACTTGTACAGCTCGTCCATGCCGTGA | Overlaps RNA5 and eGFP    | Amplify eGFP, Cloning     |
| R5F                | AGTTACAATATATTTGTTCCAATGA                    | 176 - 200                 | Amplify RNA5, Cloning     |
| R5R                | CACTGGTGCAAGCTTTAAAAG                        | 1605 - 1625               | Amplify RNA5, Cloning     |
| NbactinF           | AAAGACCAGCTCATCCGTGGAGAA                     | 128 - 151                 | PCR and qPCR              |
| NbactinR           | TGTGGTTTCATGAATGCCAGCAGC                     | 249 - 272                 | PCR and qPCR              |

---
